# Supplementary material for: Genetic diversity and population divergences of an indigenous tree (Coffea mauritiana) in Reunion Island: role of climatic and geographical factors
Source: PubMed Central journal article supplement (PMC6781115; doi:10.1038/s41437-018-0168-9), 2018-11-26
Supplement: 41437_2018_168_MOESM1_ESM.pdf [file 41437_2018_168_MOESM1_ESM.pdf]

### Variables factor map (PCA)

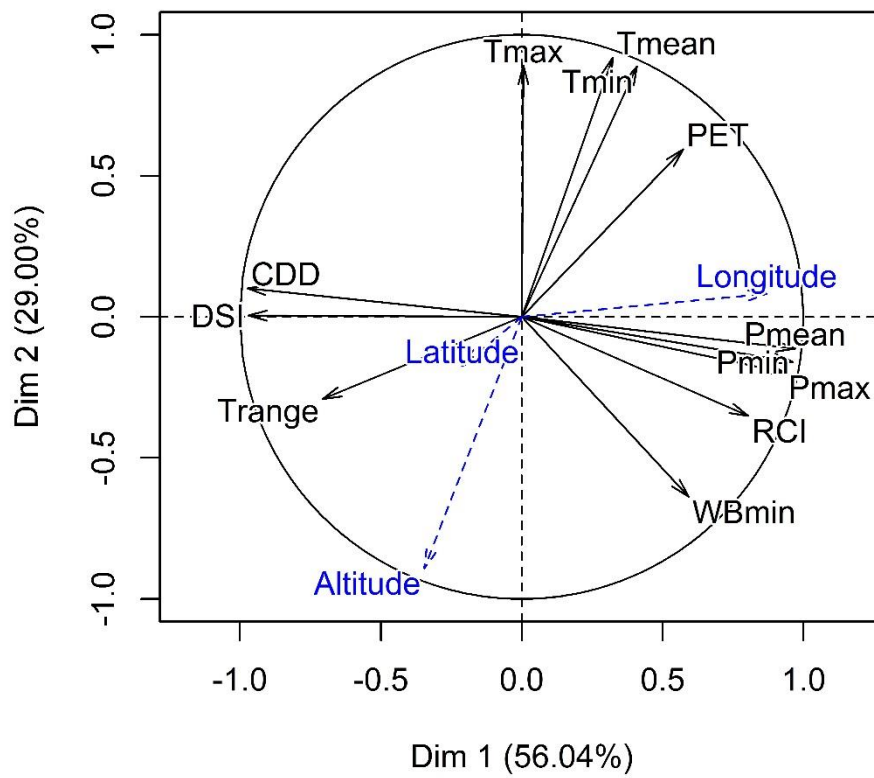

**Figure S1.** PCA results for the 12 climatic variables. Longitude, Latitude and Altitude were set as illustrative factors. Percentage of explained variance of each axis is given in parentheses.

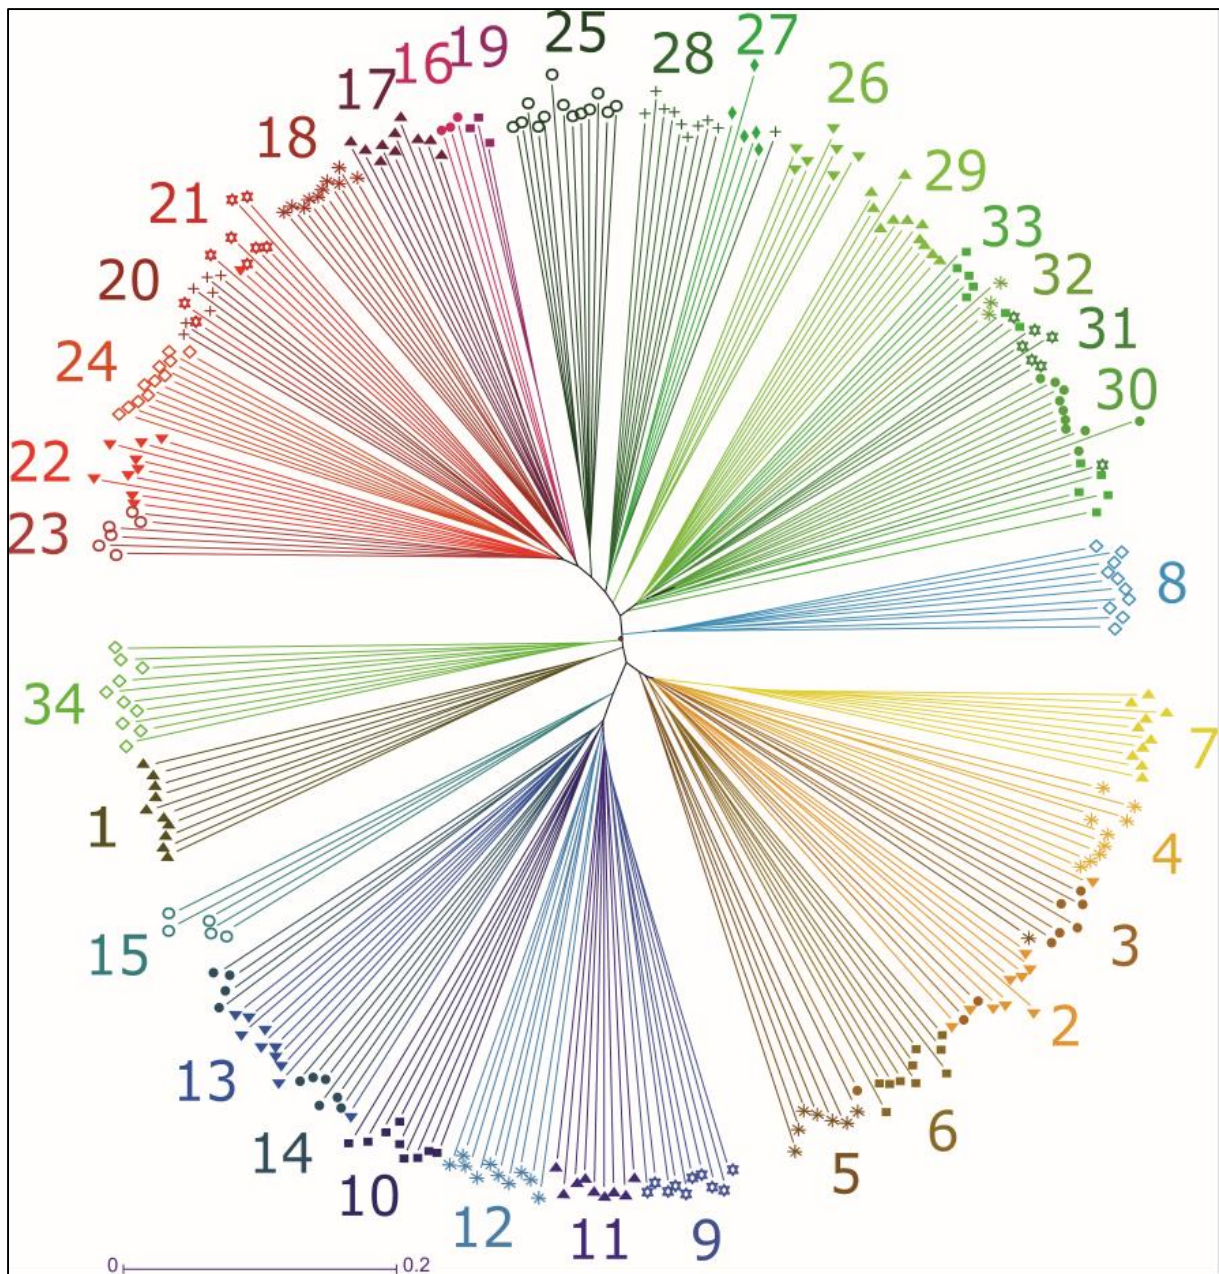

**Figure S2.** Unweighted NJ tree based on Jaccard's distances estimated from 1860 filtered SilicoDArT markers among 296 *C. mauritiana* (individuals < 5% NA) samples originating from 34 source populations in Reunion Island. Source population codes are given in Table 1. Colors distinguish the main geographical regions of sampling.

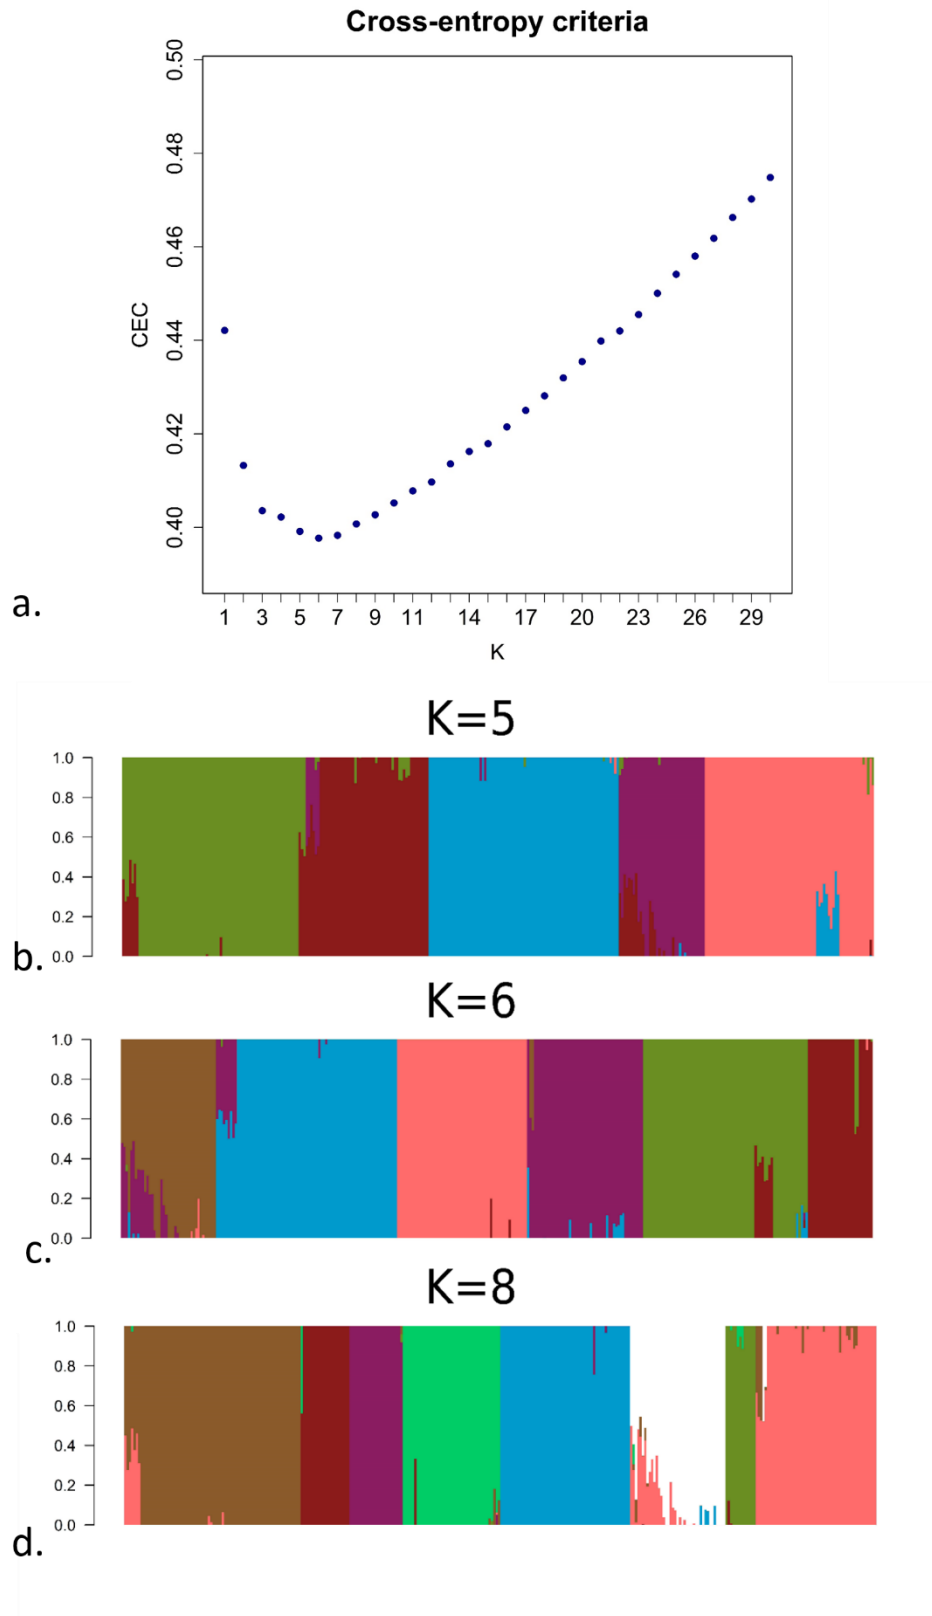

**Figure S3.** Inference of spatial genetic structure using sNMF. **(a)** Values of cross-entropy criteria (CEC) estimated for each putative number of genetic clusters (K). The best CEC value is displayed for each putative K value. **(b)** Group assignment at K=5. **(c)** Group assignment at K=6. **(d)** Group assignment at K=8.

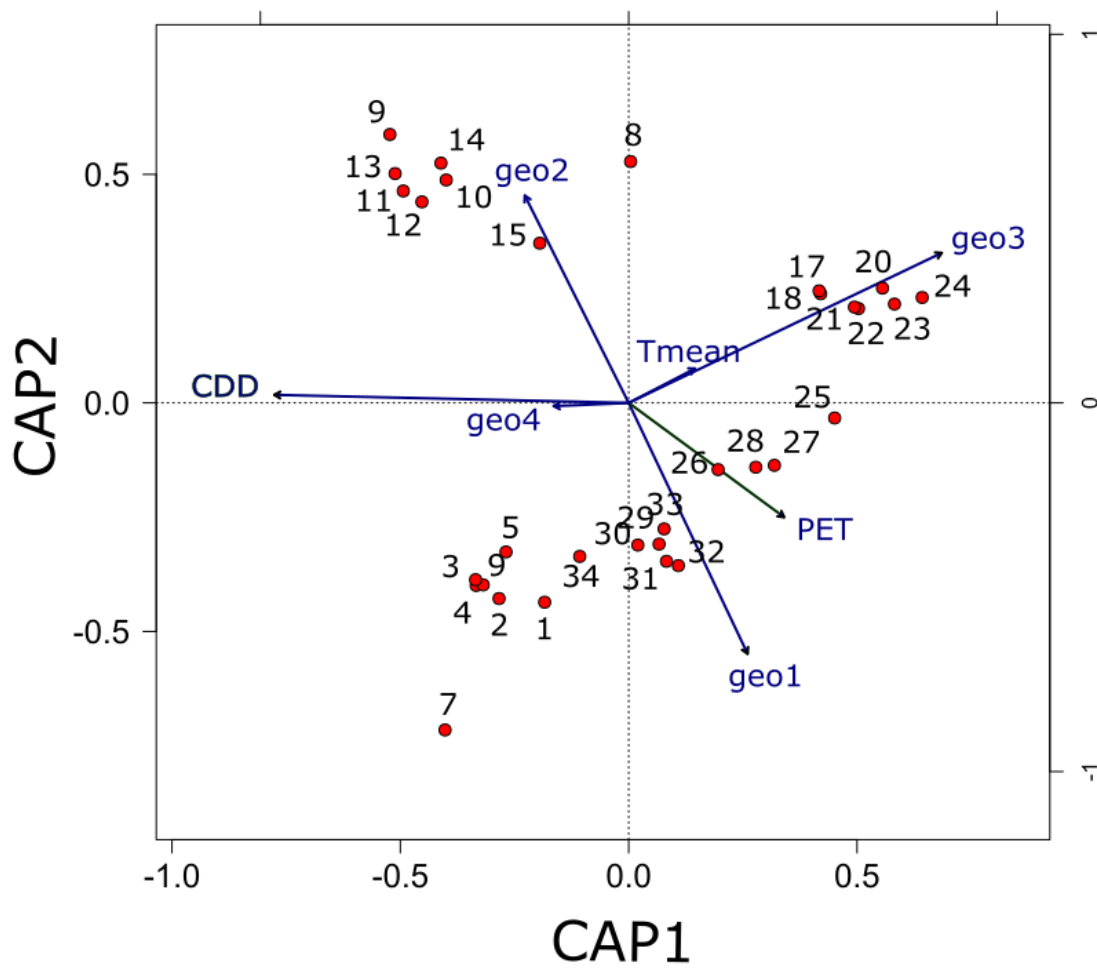

**Figure S4.** Biplot of RDA analysis. Information on source populations is given in table 1. Eigenvalues for constrained axes: CAP1=34.37%; CAP2=10.09%. Tmean: average daily temperature; CDD: mean number of consecutive dry days; PET: average monthly potential evapotranspiration; geo1, geo2, geo3: uncorrelated descriptors of geographic distances

**Table S1.** Species sampled for DArTseq experiment

| Species                      | Origin             | Acc. Code*   | Biogeographic group        |
|------------------------------|--------------------|--------------|----------------------------|
| <i>C. mauritiana</i>         | Reunion Island     | 1 to 326     | Mascarenes                 |
| <i>C. mauritiana</i>         | Mauritius          | RM-CF-00599  | Mascarenes                 |
| <i>C. macrocarpa</i>         | Mauritius          | RM-CF-00615  | Mascarenes                 |
| <i>C. bernardiniana</i>      | Mauritius          | RM-CF-00638  | Mascarenes                 |
| <i>C. bernardiniana</i>      | Mauritius          | RM-CF-00655  | Mascarenes                 |
| <i>C. bernardiniana</i>      | Mauritius          | MPL-B        | Mascarenes                 |
| <i>C. myrtifolia</i>         | Mauritius          | MPL-M        | Mascarenes                 |
| <i>C. myrtifolia</i>         | Mauritius          | RM-CF-00662  | Mascarenes                 |
| <i>C. myrtifolia</i>         | Mauritius          | RM-CF-00658  | Mascarenes                 |
| <i>C. bertrandii</i>         | Madagascar         | RM-CF-00515  | Madagascar                 |
| <i>C. perrieri</i>           | Madagascar         | RM-CF-00513  | Madagascar                 |
| <i>C. tsirananae</i>         | Madagascar         | RM-CF-00514  | Madagascar                 |
| <i>C. dolichophylla</i>      | Madagascar         | MPL-D        | Madagascar                 |
| <i>C. sessiliflora</i>       | Kenya              | RM-CF-00487  | East Africa                |
| <i>C. pseudozanguebariae</i> | Kenya              | RM-CF-00471  | East Africa                |
| <i>C. eugenioides</i>        | Kenya              | RM-CF-00422  | East Africa                |
| <i>C. canephora</i>          | D.R. Congo         | MPL-HD200-94 | West and central<br>Africa |
| <i>C. liberica</i>           | Central African R. | RM-CF-00207  | West and central<br>Africa |

\* Accession numbers of either the IRD *Coffea* field genebank (RM-CF, [www.intertrop.antilles.inra.fr/Portail/](http://www.intertrop.antilles.inra.fr/Portail/)) or the greenhouse collection (MPL) are given.

**Table S2.** Pearson's correlation coefficients calculated between the 12 climatic variables, elevation, longitude and latitude. Pearson's correlation coefficients are below the diagonal and p-values calculated according to Holm's method are above.

|           | Tmin  | Tmean  | Tmax   | Trange | Pmin  | Pmean  | Pmax   | RCI    | CDD    | DSI    | PET   | WBmin  | Elevation | Longitude | Latitude |
|-----------|-------|--------|--------|--------|-------|--------|--------|--------|--------|--------|-------|--------|-----------|-----------|----------|
| Tmin      |       | <0.001 | <0.001 | 0.03   | 1     | 1      | 1      | 1      | 1      | 1      | 0.005 | 1      | <0.001    | 1         | 1        |
| Tmean     | 0.98  |        | <0.001 | 0.85   | 1     | 1      | 1      | 1      | 1      | 1      | 0.01  | 1      | <0.001    | 1         | 1        |
| Tmax      | 0.82  | 0.91   |        | 1      | 1     | 1      | 1      | 1      | 1      | 1      | 0.86  | 1      | <0.001    | 1         | 1        |
| Trange    | -0.59 | -0.43  | -0.02  |        | 0.06  | 0.002  | 0.14   | 1      | 0.001  | <0.001 | 0.14  | 1      | 0.75      | 0.61      | <0.001   |
| Pmin      | 0.24  | 0.17   | -0.1   | -0.56  |       | <0.001 | <0.001 | <0.001 | <0.001 | <0.001 | 0.24  | <0.001 | 1         | 1         | <0.001   |
| Pmean     | 0.29  | 0.21   | -0.12  | -0.67  | 0.92  |        | <0.001 | <0.001 | <0.001 | <0.001 | 0.45  | 0.03   | 1         | 1         | <0.001   |
| Pmax      | 0.19  | 0.13   | -0.14  | -0.53  | 0.89  | 0.97   |        | <0.001 | <0.001 | <0.001 | 1     | 0.01   | 1         | 1         | <0.001   |
| RCI       | 0.01  | -0.02  | -0.16  | -0.25  | 0.85  | 0.79   | 0.88   |        | <0.001 | <0.001 | 1     | <0.001 | 1         | 1         | 0.12     |
| CDD       | -0.29 | -0.2   | 0.12   | 0.68   | -0.97 | -0.95  | -0.89  | -0.76  |        | <0.001 | 0.08  | 0.01   | 1         | 1         | <0.001   |
| DSI       | -0.41 | -0.31  | 0.02   | 0.74   | -0.92 | -0.95  | -0.89  | -0.71  | 0.95   |        | 0.23  | 0.03   | 1         | 1         | <0.001   |
| PET       | 0.65  | 0.63   | 0.43   | -0.53  | 0.5   | 0.47   | 0.41   | 0.28   | -0.55  | -0.5   |       | 1      | 0.02      | 1         | 0.03     |
| WBmin     | -0.24 | -0.3   | -0.41  | -0.15  | 0.71  | 0.6    | 0.63   | 0.74   | -0.62  | -0.59  | -0.24 |        | 1         | 1         | 1        |
| Elevation | -0.98 | -0.99  | -0.89  | 0.44   | -0.2  | -0.22  | -0.14  | -0.01  | 0.22   | 0.34   | -0.6  | 0.24   |           | 1         | 1        |
| Longitude | -0.18 | -0.13  | 0.1    | 0.45   | -0.1  | -0.32  | -0.22  | 0.09   | 0.22   | 0.23   | -0.31 | 0.28   | 0.14      |           | 0.02     |
| Latitude  | 0.39  | 0.31   | -0.04  | -0.75  | 0.8   | 0.89   | 0.8    | 0.54   | -0.88  | -0.87  | 0.59  | 0.34   | -0.33     | -0.6      |          |







**Table S5.** Results from *f3-statistic* tests among the seven clusters defined by sNMF analysis. Only negative Z-score are shown. According to Reich *et al.* (2009), results were considered as significant when Z-score < -2. Admixt population = population tested for admixture between parent 1 and 2.

| Admixt population | Parent 1 | Parent 2 | f3-statistic | s.e.     | Z-score         |
|-------------------|----------|----------|--------------|----------|-----------------|
| SW                | W        | NE       | -0.00109     | 0.000615 | -1.77402        |
| SW                | W        | SE       | -0.00132     | 0.0004   | <b>-3.28951</b> |
| SW                | NW       | SE       | -7.35E-05    | 0.000497 | -0.14774        |
| SW                | W        | E        | -0.00196     | 0.000659 | <b>-2.98648</b> |
| SE                | W        | E        | -0.00127     | 0.000599 | <b>-2.12336</b> |
| SE                | E        | SW       | -0.00063     | 0.000414 | -1.51478        |
| C                 | NE       | NW       | -0.00165     | 0.000845 | -1.94858        |
| C                 | NW       | E        | -0.00164     | 0.000948 | -1.73423        |
